# Supplementary material for: Anion selectivity properties of ruthenium(ii) tris(5,5′-diamide-2,2′-bipyridine) receptors dictated by solvent and amide substituent
Source: Royal Society of Chemistry journal article supplement (doi:10.1039/b008822f), 2001-01-01
Supplement: b008822f.doc [file b008822f.doc]

# Crystal structure determination of receptor -6

The crystals were positioned at 70 mm from the Image Plate. 100 frames were measured at 2˚ intervals with a counting time of 8 min. Data analysis was carried out with the XDS program.1 The structure was solved using direct methods with the SHELX86 program.2 The non-hydrogen atoms were refined with anisotropic thermal parameters. The hydrogen atoms were included in geometric positions and given thermal parameters equivalent to 1.2 times those of the atom to which they were attached. Several of the –CH2CH2OMe chains showed high thermal motion and were refined with distance constraints. The crystallographic data were of poor quality due to the high thermal motion of some of the –CH2CH2OMe chains. The chirality was determined by a Flack parameter of 0.23(9), which though not definitive was consistent with the structure having a lower *R* value than with the coordinates reversed. The C(Ph)–C(Ph)–C–N torsion angles range from 21.9 to 45.9˚. However, a search of the Cambridge Crystallographic Database for equivalent Ph–C(O)–NH–CH2–R fragments shows that the –NH moiety is usually rotated out of the plane of the phenyl ring with an average torsion angle of 21.0˚ within a range of 2.4 to 35.8˚, so the values in the present structure are only slightly greater than normal but their size does indicate that the amide groups need to rotate significantly more than is usually found to form the hydrogen bond interactions.

1 W. Kabsch, *J. Appl. Crystallogr.*, 1988, **21**, 916.

2 SHELX86, G. M. Sheldrick, *Acta Crystallogr., Sect. A*, 1990, **46**, 467.
